# Supplementary material for: Splice variant PRKC-ζ-PrC is a novel biomarker of human prostate cancer
Source: PubMed Central journal article supplement — Br J Cancer. 2012 May 29;107(2):388–99. doi: 10.1038/bjc.2012.162 (PMC3394965; doi:10.1038/bjc.2012.162), 2012-05-29
Supplement: bjc2012162x2.pdf [file bjc2012162x2.pdf]

# Supplementary Figure S2

1 | 50 | 100  
| | |  
TGGTNGGAGATGGANTGAGCCNGTGAATGAGTGAGTGAGCAGGAGTGGGTTAGAGAGCGAGGGAGTGAGTGAATGAGTGGGCTAAAGAGGGCGGGCGCG  
101 | 150 | 200  
| | |  
GTGGCTCACGCCTGTAATCCAGCACCTTTGGGAGGCCGAGGAGGGCAGATGATCTGAGGTCAGCAGTTGCGGAGCAGCCTGGTCAACATGGTGAACCCCT  
201 | 250 | 300  
| | |  
GCCTCTACTAAAAATACAAAACAAAATTAGCCAGGCCTGGTGGCGGGCGCTGTACTCCAGCTACTCAGAAGGCTGAGCGGGAGAAATGGTGTGAACC  
301 | 350 | 400  
| | |  
TGGGAGGTGGAGCTTGCAGTGAGCCGAGATCGTCCACTGCACCTTCACTGGGAGACAGAGCGAGTCTCCGTCTCAAAACAAAACCAAAANNAAATTT  
401 | 450 | 500  
| | |  
ACCTGGNCTGCTNGNCCATGCNTNTNCTNCTACTNNTGAGACTGNAGCATNACANTAGNTTGAATCNGAGTCNGAGTTGCNCTGANCCGAGNCTC  
501 | 550 | 600  
| | |  
NTGCCNCTGNCNTNAGCCTGNGCANCAGACNANGACTCCATCTCAAAAANNANTTGNCTNAGTGAGTGAATGAGTGAATGGGAGTGGGTTAGCGAGG  
601 | 650 | 700  
| | |  
GAGTGAGAGGGTGAATGGGAGTGGGTTAGAGAGGGAGTGAGAGGGTGAATGGGAGTGGGTTAGAGAGTGAGGGAGTAACCGAGTGAATGTCTCTTGGTGC  
701 | 750 | 800  
| | |  
TGCTGTAAACAGAAACCTGAGCGAGCCTGGGTAATTTCTAGGGAGCAGAGTTCTTTCCAGCTGTGGAGGTGGGAGTCCAGGGTCATGGTCCAGCAGG  
801 | 850 | 900  
| | |  
CTTGGTGTCTGGTGGGCTGATCTCTGCTTCCAAGANGGNGNCCAAACANTGCATTTCCCNANANANANGGAGGAAGGCCANGTGTCCACANGGCA  
901 | 950 | 1000  
| | |  
GAAGGCAGAGAGGAATCCATGCCAAGCTGTCTTGACAGNTACAGGAGTTTGTCTGTGAGGGCGGGGCTCCCATCAGGTTCCACCTCTNTACACTGTTCC  
1001 | 1050 | 1100  
| | |  
TNTGGGGAATGAGTTTCTCACTGTGAATCTGGGGGCACATTCAGACCCATATTGTTGGTGAGTGGGAGAGCATGGCTGTCTCACTGGGACAAGTGGCCAT  
1101 | 1150 | 1200  
| | |  
GAGTCGGGGGAACGAGGGGTTTTTCAGTGTCTTCCAGGCTATGTGTGTGGCCACTGTGCCAGGCACCGCTTCTGCCCTCCCGGCAGAGCGCATCA  
1201 | 1250 | 1300  
| | |  
CCGAGTCCCAGGCCCGCTGTGGGCATTTTCTGCCAAGCAGCAGCTGAGATTCTGAAGTCGATGCCGTGGATAGGCAGAAATGGGCCGGCAGGAGGCTC  
1301 | 1350 | 1400  
| | |  
CTGACAGACGGGCTGTGCAGTGCAGCGCAGGCAGGGTGTCTGTGGCCAGGTCCTACACCTTTATGGTCCAGGGTCCAAAGACGTCATGAGACGGCTTGT  
1401 | 1450 | 1500  
| | |  
CAGCCAGTTAGTTGTGGTGCCTTCTGAACAGGACCCCCCAAGGAAGGGGGTGGCCTCGCATGGGTGGTGGGGATCCGTCTCCGTCCACATGTGG  
1501 | 1550 | 1600  
| | |  
CCAGCATGGCCGACACTGGCATTTTCTCAGCTCGACAACAATTTTCTGACTTTGGATATTTTCTAGATTTTGTGTTGTAGAAAAAACACTTGGCAGTCA  
1601 | 1650 | 1700  
| | |  
AATACTAGGCAGATNAATGCNACTNCTACTTNCCTTTCATTTTGTGATGAGTGCCTGCAAAACACTCAATCTGGTAGGGATGATGCCCGCGGGAGC  
1701 | 1750 | 1800  
| | |  
TGACCCCTTCTCTATTGTTTTTCCAGCTGGAGANGANGCAGGCCTCCCTCCNTTCC . GCC . CAGATCACAGACGACTACGGTCTGGACAACCTTTGACA  
1801 | 1850 | 1900  
| | |  
CACAGTTCCACAGCGAGCCCTGCAGCTGACCCAGACGATGAGTGAGTCCACCTGGGTGCGGGTCCCTGGAGCACCCCTCGGGCAGCCCATGGCAGGC  
1901 | 1950 | 2000  
| | |  
CGGCACCTTTGGCAGCTGGTGACCCAGCCTGCCCTGAGTCCCACCCGCTGGTGTCTCTCTCCAGTGGGCGTTGGGGAGGATTCCTTATGCGAACGTG  
2001 | 2050 | 2100  
| | |  
ACTCCGCTTCCCCCAAGGGAATGAACACAGGTCACCCCTCCCTCCCTGACACCTTTGCCACAGGGATGCCATAAAGAGGATCGACCACTCAGAGTTC  
2101 | 2150 | 2200  
| | |  
GAAGGCCTTGTAGTATATCAACCCATTATGCTGTCCACCGAGGAGTGGTGTGAGGCCGCTGCGTCTGTGTCGTTGGACACGCGTGATTGACCCCTTAAC  
2201 | 2250 | 2300  
| | |  
TGTATCCCTTAACCACCGCATATGCATGCCAGGCTGGGCACGGCTCCGAGGGCGGCCAGGGACAGACCCCTTGCGCCGAGACCGCAGGGGAAGCGTCAGCG  
2301 | 2350 | 2400  
| | |  
GGCGCTGCTGGGAGCAGAACAGTCCCTCACACCTGGGCCCGGGCAGGCCAGCTTCTGCTGCTGGAGAACTTGCTGCTGTGCCGTGCGCGGGGATCCGC  
2401 | 2450 | 2500  
| | |  
GGGACCCCTGCCAGGGGGCTGTATGCGGTTTCCAAGGTGCACATTTTCCACGGAAACAGAACTCGATGCACTGACCTGCCTGCCAGGTAAAGTGGCG  
2501 | 2550 | 2600  
| | |  
TGTAGCGTCTGAGGAATAAAATGTTCCGATGATGTGGAAGCTCCTCTGATGCCTTTTTCCGTGAGTGGCGCTGCCCCACATCTCAGACGCAACCCAC  
2601 | 2650 | 2700  
| | |  
ACGTAGGGGGGAGCTTAGGAGCCAGCGGGACACAGGTGGGGGCGGGAGTTGAAGTACCTGTGGGGACACCGCAATCAAGAAATGTTTCCATAAAAAC  
2701 | 2750 | 2800  
| | |  
CCGGTAAGTTCTGTGTTCTTCCCTGCAGAGTGTGCCAGCCGCTGTGGTCTAGGGTGAAGTGACACCTTAAGCAGATGGCAGCTGGGCCAGCCAGCTC  
2801 | 2850 | 2900  
| | |  
ACTGGAACCGATGGGGGAAATGGATCATAGAGATTCTAAAACGTGGCCCAACAAAGCACAGTAGACCAGAAAGAGAAAAACTGAACACTAAATCTGCA  
2901 | 2950 | 3000  
| | |  
CAATCATTTCTGACCACTAAGCAGTGCCTGCACGATGCTCGTGCAGCATTGATTTTTGGAAGATATCTTATCTGTCAACAGCAGCTGAGAGT  
3001 | 3050 | 3060  
| | |  
TAGGAAAAACTAAAAGATGTGGCATGGACGGACCCCGCTTAAAGNAACCGTNTACCCCT
