# Supplementary figures and images for: Splice variant PRKC-ζ-PrC is a novel biomarker of human prostate cancer
Source: PubMed Central journal article supplement — Br J Cancer. 2012 May 29;107(2):388–99. doi: 10.1038/bjc.2012.162 (PMC3394965; doi:10.1038/bjc.2012.162), 2012-05-29

# Supplementary Figure 1

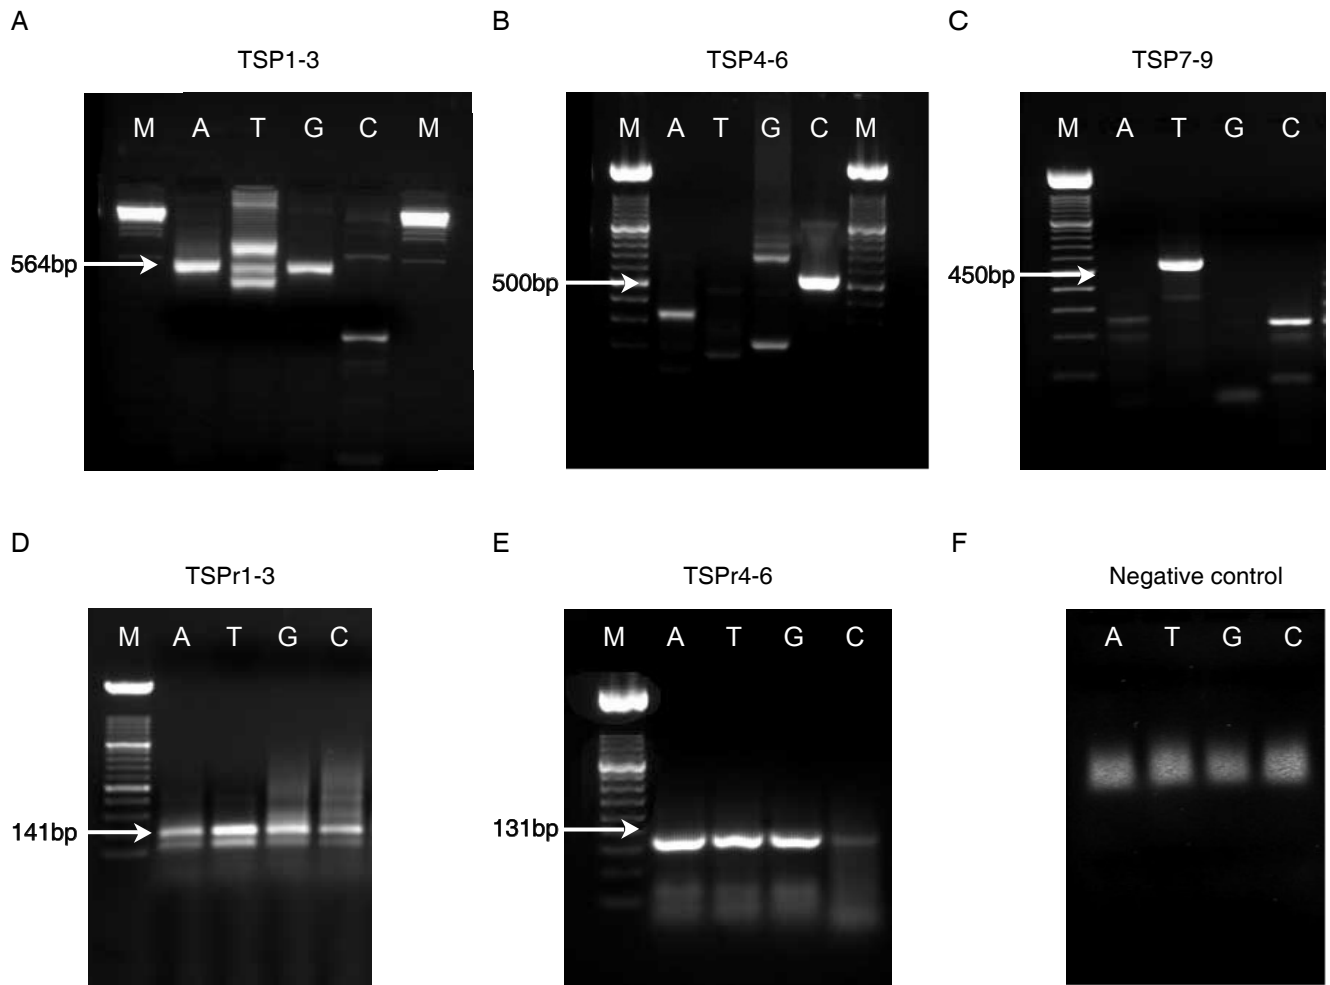

Supplement: bjc2012162x1.pdf [file bjc2012162x1.pdf]
